# Supplementary material
Source: HighWire-hosted journal article supplement (https://www.cfp.ca/highwire/filestream/30359/field_highwire_adjunct_files/0/GeneSeries_Long_QT_Syndrome.pdf)
Supplement: GeneSeries_Long_QT_Syndrome.pdf [file GeneSeries_Long_QT_Syndrome.pdf]

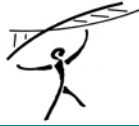

## ☆ **Topic:** Long QT Syndrome

☆ **Summary:** Some researchers claim that babies should be routinely tested for long QT syndrome (LQTS) by electrocardiogram (ECG) at around three weeks of age because it would be cost-effective and save lives.

☆ **Bottom line:** The ECG is neither sensitive nor specific for hereditary LQTS, and can be hard to interpret in newborns. Routine ECG screening of newborns remains controversial, but any individual with clinical features (e.g. syncope with exercise in a young person), typical ECG, or a family history of LQTS or young sudden death should be referred to a heart rhythm specialist and a genetics clinic, for assessment of self, at-risk relatives and genetic testing where indicated.

## ✓ **The Disease: LQTS**

- A disorder involving the cardiac ion channels that affects approximately 1 in 5,000 people
- Results in prolongation of the ventricular action potential during cardiac repolarization (i.e. prolonged QT interval on ECG)
- In women and children, a QTc of > 460ms is considered abnormal; in men, QTc > 450ms is abnormal. There is a considerable borderline range between normal and abnormal QTc. (QTc: heart rate corrected QT interval)
- Predisposes to syncope and/or sudden cardiac death
- Cardiac events may be triggered by exercise, auditory stimuli (e.g. alarms) or emotional stress. These cardiac events may appear seizure-like and may be mislabeled as epilepsy.
- LQTS is treatable with beta-blockers, implantable cardioverter defibrillators, and avoidance of triggers & QT-prolonging drugs.
- Hereditary forms of LQTS are usually autosomal dominant.
- LQTS is one of numerous causes of SIDS.
- LQTS can also be acquired, for example by drug use (see [www.qtdrugs.org](http://www.qtdrugs.org)) or anorexia nervosa.

## ✓ **The Genes**

- At least 8 genes have been implicated in LQTS. The 3 most common are:  
**LQT1** (KCNQ1) on chromosome 11, encodes potassium channel subunits  
**LQT2** (HERG, KCNH2) on chromosome 7, encodes potassium channel subunits  
**LQT3** (SCN5A) on chromosome 3, encodes sodium channel subunits
- Some genotype-phenotype correlations may be drawn.

## ✓ **Consequences of having a faulty gene**

- A man or woman with LQTS has a 50% chance of passing the tendency to arrhythmia to each child.
- Females are more likely than males to experience clinical symptoms of LQTS.
- LQTS demonstrates reduced penetrance and variable expressivity.
- First events often occur in the teen years.
- Individuals with 2 abnormal copies of the LQT1 and LQT5 genes develop Jervell and Lange-Nielsen syndrome (JNLS) which is characterized by bilateral sensorineural hearing loss in addition to significantly prolonged QT interval.

## ✓ **Who should be offered referral for genetic counseling/testing?**

- Individuals with clinical symptoms of LQTS or a suggestive ECG **should be referred to a cardiac arrhythmia specialist**. If the cardiologist suspects LQTS, then a referral for genetic counseling/testing is indicated.
- Family members of individuals diagnosed with LQTS, or with a history of young sudden death.
- Family members of an infant who has died of SIDS; referral to genetics for detailed family history and consideration of postmortem genetic testing.

### ✓ Testing - for the faulty genes

- Testing of LQTS genes is not currently performed on a clinical basis in Ontario, although some testing is offered on a research basis. A genetics service can arrange testing for eligible patients in an out-of-province clinical genetics laboratory.

### ✓ Benefits of genetic testing

- Clarification of LQTS risk status among individuals with borderline clinical investigations
- Assistance with life planning (e.g. decisions about careers, participation in competitive sports)
- For those who test negative for a known family mutation, relief from worry that they will develop the disease in the future and knowledge that their children are not at risk of inheriting the disease

### ✓ Harms/limitations of genetic testing

- Adverse psychological reaction, family issues/distress
- Uncertainty due to a genetic variant of unknown significance
- Insurance/job discrimination, confidentiality issues
- Survivor guilt for family members who did not inherit the gene mutation.

☆ **Web Resources:** National Institutes of Health GeneTests website: [www.genetests.org](http://www.genetests.org)  
Center for Education and Research on Therapeutics: [www.qtdrugs.org](http://www.qtdrugs.org)

### ☆ Review Articles:

1. Quaglini S, Rognoni C, Spazzolini C, Priori SG, Mannarino S, Schwartz PJ. Cost-effectiveness of neonatal ECG screening for the long QT syndrome. *Eur Heart J* 2006;27(15):1824-32. Epub 2006 Jul 13.
2. Modell SM, Lehmann MH. The long QT syndrome family of cardiac ion channelopathies: a HuGE review. *Genet Med* 2006;8(3):143-55.

*"Gene Messenger" is for educational purposes only and should not be used as a substitute for clinical judgement. The "GenetiKit" team aims to aid the practicing clinician by providing informed opinions regarding genetic services that have been developed in a rigorous and evidence-based manner. Physicians must use their own clinical judgement in addition to published articles and the information presented herein. The members of the GenetiKit research team assume no responsibility or liability resulting from the use of information contained on "Gene Messenger."*

Funding provided by CIHR

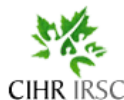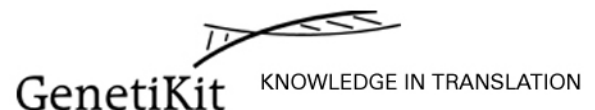

**Dr Carroll** is Principal Investigator of the GenetiKit Project, the Sydney G Frankfort Chair in Family Medicine at Mount Sinai Hospital in Toronto, Ont, and Associate Professor in the Department of Family Medicine at the University of Toronto.

In alphabetical order, other members of the GenetiKit Team are as follows: **Dr Allanson** is Chief of the Department of Genetics at the Children's Hospital of Eastern Ontario (CHEO) in Ottawa, Ont, and Full Professor in the Department of Pediatrics at the University of Ottawa. **Dr Blaine** is an Assistant Professor in the Department of Family and Community Medicine at the University of Toronto in Ontario and Lead Physician of

the STAR Family Health Team in Stratford, Ont. **Ms Cremin** is a Genetic Counselor in the Hereditary Cancer Program at the BC Cancer Agency in Vancouver. **Ms Dorman** is a Genetic Counselor at the Sudbury Regional Hospital in Ontario. **Ms Gibbons** is a Genetic Counselor at the North York General Hospital in Ontario. **Dr Ian Graham** is Vice-President of Knowledge Translation at the Canadian Institutes of Health Research. **Dr Grimshaw** is a Professor in the Department of Medicine and Director of the Clinical Epidemiology Program at the Ottawa Health Research Institute. **Ms Honeywell** is an Assistant Professor in the Department of Pediatrics at the University of Ottawa and in the CHEO Departments of Genetics and Cardiology. **Dr Meschino** is a Clinical Geneticist at North York General Hospital and Assistant Professor in the Department of Paediatrics at the University of Toronto. **Ms Permaul** is a Research Associate in the Granovsky Gluskin Family Medicine Centre at Mount Sinai Hospital. **Dr Wilson** is an Associate Professor in the Department of Epidemiology and Community Medicine at the University of Ottawa.
